# Supplementary material for: Predictive Modeling for Readmission to Intensive Care: A Systematic Review
Source: PubMed Central journal article supplement — Crit Care Explor. 2023 Jan 6;5(1):e0848. doi: 10.1097/CCE.0000000000000848 (PMC9829260; doi:10.1097/cce.0000000000000848), 2023-01-06
Supplement: cc9-5-e0848-s001.pdf [file cc9-5-e0848-s001.pdf]

## **Supplemental Digital Content**

### **Appendix A: Search Terms**

#### **PubMed**

(ICU[tiab] OR "Intensive Care Units"[Mesh] OR "Intensive care unit\*"[tiab] OR "critical care unit\*"[tiab] OR CCU[tiab]) AND

("readmission\*"[tiab] OR "re-admission\*"[tiab] OR "re admission\*"[tiab])

AND

("machine learning\*"[tiab] OR "deep learning\*"[tiab] OR "Decision Support Systems, Clinical"[Mesh] OR "Artificial

Intelligence"[Mesh] OR "Mathematical Concepts"[Mesh] OR "Models, Statistical"[Mesh] OR "Forecasting"[Mesh] OR "model\*"[ti

OR "predict\*"[ti])

NOT ("pediatric\*"[ti])

Filters: Full text, 2010-2021, English

#### **Web of Science**

TS=("Intensive care unit\*" OR "ICU\*" OR "Critical care unit\*" OR "CCU\*")

AND

TS=("readmission\*" OR "re-admission\*" OR "re admission\*")

AND

TS=("model\*" OR "prediction\*" OR "machine learning\*" OR "deep learning\*" OR "clinical decision support\*")

AND

PY=(2010 OR 2011 OR 2012 OR 2013 OR 2014 OR 2015 OR 2016 OR 2017 OR 2018 OR 2019 OR 2020 OR 2021)

NOT TI=("pediatric\*")

Language English

### **Cochrane**

#1 MeSH descriptor: [Intensive Care Units] explode all trees 3711

#2 ("intensive care unit" OR "ICU" OR "CCU" OR "critical care unit"):ti,ab,kw (Word variations have been searched)  
26223

#3 MeSH descriptor: [Decision Support Systems, Clinical] explode all trees 392

#4 MeSH descriptor: [Mathematical Concepts] explode all trees 27044

#5 ("machine learning" OR "deep learning" OR "model" OR "prediction"):ti,ab,kw (Word variations have been searched) 196428

#6 ("readmission" OR "re-admission" OR "re admission"):ti,ab,kw (Word variations have been searched) 7457

#7 ("pediatric"):ti (Word variations have been searched) 14377

#8 (#1 OR #2) AND ( #3 OR #4 OR #5) AND (#6) NOT (#7) with Cochrane Library publication date Between Jan 2010  
and Apr 2021 100

### **Embase/Medline**

('intensive care unit\*':ti,ab,kw,exp OR 'icu\*':ti,ab,kw,exp OR 'ccu\*':ti,ab,kw,exp OR 'critical care unit\*':ti,ab,kw,exp) AND  
(('readmission\*' OR 're-admission\*' OR 're admission\*') NEAR/12 ('intensive care unit\*' OR 'icu\*' OR 'ccu\*' OR 'critical care  
unit\*')) AND ('readmission\*':ti,ab,kw,exp OR 're-admission\*':ti,ab,kw,exp OR 're admission\*':ti,ab,kw,exp) AND  
('model\*':ti,ab,kw,exp OR 'prediction and forecasting\*':ti,ab,kw,exp OR 'clinical decision making\*':ti,ab,kw,exp OR 'clinical  
decision support system\*':ti,ab,kw,exp OR 'machine learning\*':ti,ab,kw,exp OR 'artificial intelligence\*':ti,ab,kw,exp) AND  
(2010:py OR 2011:py OR 2012:py OR 2013:py OR 2014:py OR 2015:py OR 2016:py OR 2017:py OR 2018:py OR  
2019:py OR 2020:py OR 2021:py) AND ('article'/it OR 'conference paper'/it OR 'review'/it)

**Supplemental Table 1:** Summary of characteristics and performance of studies reporting intensive care unit readmission prediction models.

| Author/<br>Model Type                                                   | Cohort Type and<br>Description                     | Sample Size<br>(number of events [%])                                                                                                | Outcome Definition                                                                  | AUROC %<br>(95% CI)                                 | Sensitivity<br>% (95 % CI)                                                        | Specificity %<br>(95% CI)                                                         | Static vs<br>Dynamic<br>Data |
|-------------------------------------------------------------------------|----------------------------------------------------|--------------------------------------------------------------------------------------------------------------------------------------|-------------------------------------------------------------------------------------|-----------------------------------------------------|-----------------------------------------------------------------------------------|-----------------------------------------------------------------------------------|------------------------------|
| <i>Multicenter Studies</i>                                              |                                                    |                                                                                                                                      |                                                                                     |                                                     |                                                                                   |                                                                                   |                              |
| Rojas 2018 [14]<br>GBM                                                  | Multicenter<br>Retrospective<br>Mixed SICU/MICU    | Internal Development:<br>24,885 ICU admissions<br>(2,834 [11%])<br><br>External Validation:<br>42,303 ICU admissions<br>(3,458 [8%]) | ICU readmission during<br>index hospitalization<br>OR<br>Ward cardiac arrest        | 76 (75-78)                                          | 28 (NR)                                                                           | 95 (NR)                                                                           | Static                       |
| Ouanes 2012 [15]<br>Logistic Regression                                 | Multicenter<br>Retrospective<br>General ICU        | 3,462 Patients<br>(102 [3%])                                                                                                         | ICU readmission during<br>index hospitalization<br>OR<br>In-hospital ward mortality | 74 (68-79)                                          | NR                                                                                | NR                                                                                | Static                       |
| VanDiepen 2014<br>[16]<br>Logistic Regression                           | Multicenter<br>Retrospective<br>Postoperative CICU | 10,799 Patients<br>(479 [4%])                                                                                                        | ICU readmission during<br>index hospitalization                                     | 80 (NR)                                             | NR                                                                                | NR                                                                                | Static                       |
| Verma 2019 [17]<br>Logistic Regression                                  | Multicenter Prospective<br>Postoperative CICU      | 805 Patients<br>(37 [5%])                                                                                                            | ICU readmission                                                                     | 78 (NR)                                             | NR                                                                                | NR                                                                                | Static                       |
| Badawi 2012 [18]<br>Logistic Regression                                 | Multicenter<br>Retrospective<br>General ICU        | 704,963 Patients<br><br>Readmission<br>(17,874 [3%])<br>Death<br>(6,492 [0.9%])                                                      | ICU readmission during<br>index hospitalization<br>OR<br>Post-discharge mortality   | Readmission<br>71 (NR)<br>Death<br>92 (NR)          | Readmission<br>(decreasing<br>with patient<br>severity)<br>0-99<br>Death<br>23-98 | Readmission<br>(increasing with<br>patient<br>severity)<br>3-99<br>Death<br>34-99 | Static                       |
| Fialho 2012 [19]<br>Fuzzy modeling +<br>Sequential forward<br>selection | Multicenter<br>Retrospective<br>Mixed SICU/MICU    | 1,028 Patients                                                                                                                       | ICU readmission                                                                     | 72 (68-76)                                          | 68 (66-70)                                                                        | 73 (70-76)                                                                        | Static                       |
| Chiu 2020 [29]<br>Logistic Regression                                   | Multicenter<br>Retrospective<br>Postoperative CICU | 13,631 Patients<br>(578 [4%])                                                                                                        | ICU readmission during<br>index hospitalization<br>OR<br>Ward cardiac arrest        | ≤ 6 hours<br>84 (83-85)<br>≤ 12 hours<br>82 (81-82) | ≤ 6 hours<br>74 (NR)<br>≤ 12 hours<br>69 (NR)                                     | ≤ 6 hours<br>80 (NR)<br>≤ 12 hours<br>80 (NR)                                     | Static                       |

|                                                                                    |                                                   |                                         |                                                                                                                                                                                                            |                                                                              |                                                                              |                                                                              |         |
|------------------------------------------------------------------------------------|---------------------------------------------------|-----------------------------------------|------------------------------------------------------------------------------------------------------------------------------------------------------------------------------------------------------------|------------------------------------------------------------------------------|------------------------------------------------------------------------------|------------------------------------------------------------------------------|---------|
|                                                                                    |                                                   |                                         | OR<br>In-hospital ward mortality                                                                                                                                                                           | ≤ 24 hours<br>78 (77-79)                                                     | ≤ 24 hours<br>71 (NR)                                                        | ≤ 24 hours<br>72 (NR)                                                        |         |
| Kastrup 2013 [42]<br>Logistic Regression                                           | Multicenter<br>Retrospective Mixed<br>SICU/MICU   | 7,175 Patients<br>(596 [8%])            | ICU readmission<br>OR<br>Post-discharge mortality                                                                                                                                                          | 58 (56-61)                                                                   | 55 (NR)                                                                      | 59 (NR)                                                                      | Static  |
| <i>Single Center Studies</i>                                                       |                                                   |                                         |                                                                                                                                                                                                            |                                                                              |                                                                              |                                                                              |         |
| Magruder 2015 [20]<br>Linear regression                                            | Single center<br>Prospective SICU                 | 452 Patients                            | ICU readmission                                                                                                                                                                                            | 81 (NR)                                                                      | NR                                                                           | NR                                                                           | Static  |
| Caballero 2015 [21]<br>Dynamic Linear<br>Models with<br>Logistic<br>Transformation | Single Center<br>Retrospective<br>Mixed SICU/MICU | 11,643 Patients<br>(NR)                 | ICU readmission within 24<br>hours, 48 hours, or index<br>hospitalization                                                                                                                                  | ≤ 24 hours<br>93 (NR)<br>≤ 48 hours<br>94 (NR)<br>Hospitalization<br>92 (NR) | ≤ 24 hours<br>90 (NR)<br>≤ 48 hours<br>91 (NR)<br>Hospitalization<br>91 (NR) | ≤ 24 hours<br>88 (NR)<br>≤ 48 hours<br>94 (NR)<br>Hospitalization<br>92 (NR) | Dynamic |
| Lin 2019 [22]<br>RNN + LSTM                                                        | Single Center<br>Retrospective<br>Mixed SICU/MICU | 48,393 ICU admissions<br>(11,290 [23%]) | ICU readmission during<br>index hospitalization<br>OR<br>ICU readmission within 30<br>days of hospital discharge<br>OR<br>In-hospital mortality<br>OR<br>Mortality within 30 days of<br>hospital discharge | 79 (78-80)                                                                   | 85 (NR)<br>80 (NR)                                                           | 53 (52-56)<br>62 (60-64)                                                     | Dynamic |
| Venugopalan 2017<br>[23]<br>Logistic Regression<br>+ ANN + CRF                     | Single Center<br>Retrospective<br>Mixed SICU/MICU | 32,331 Patients<br>(7,787 [24%])        | ICU readmission within 30<br>days                                                                                                                                                                          | NR                                                                           | NR                                                                           | NR                                                                           | Dynamic |
| Xue 2019 [24]<br>Logistic Regression                                               | Single Center<br>Retrospective<br>Mixed SICU/MICU | 1,170 Patients<br>(310 [26%])           | ICU readmission within 30<br>days                                                                                                                                                                          | 64 (NR)                                                                      | 57 (NR)                                                                      | 66 (NR)                                                                      | Dynamic |
| Desautels 2017[25]<br>GBM                                                          | Single Center<br>Retrospective<br>Neuro ICU       | 46, 759 ICU admissions<br>(5708 [12%])  | ICU readmission within 48<br>hours<br>OR<br>In-hospital mortality within<br>48 hours                                                                                                                       | 71 (NR)                                                                      | 60 (NR)                                                                      | 66 (NR)                                                                      | Dynamic |
| Lee 2015 [26]<br>Logistic Regression                                               | Single Center<br>Retrospective                    | 1,190 Patients<br>(96 [8%])             | ICU readmission during<br>index hospitalization                                                                                                                                                            | ICU<br>readmission                                                           | ICU<br>readmission                                                           | ICU<br>readmission                                                           | Static  |

|                                         |                                                                  |                                        |                                                                                                                                                             |                                                                    |                                                                                       |                                                                                       |         |
|-----------------------------------------|------------------------------------------------------------------|----------------------------------------|-------------------------------------------------------------------------------------------------------------------------------------------------------------|--------------------------------------------------------------------|---------------------------------------------------------------------------------------|---------------------------------------------------------------------------------------|---------|
|                                         | SICU                                                             |                                        | OR<br>In-hospital mortality                                                                                                                                 | 69 (66-71)<br>Combined<br>61 (58-63)                               | 44 (NR)                                                                               | 73 (NR)                                                                               |         |
| Ng 2018 [27]<br>Logistic Regression     | Single Center<br>Retrospective<br>General ICU                    | 4,632 Patients<br>(964 [21%])          | ICU readmission during<br>index hospitalization<br>OR<br>In-hospital mortality<br>OR<br>Rapid response systems<br>and medical emergency<br>teams (MET) call | 72 (70-73)                                                         | NR                                                                                    | NR                                                                                    | Static  |
| Rosa 2015 [28]<br>Logistic Regression   | Single Center<br>Prospective<br>Mixed SICU/MICU                  | 1,277 Patients<br>(192 [15%])          | ICU readmission within 48<br>hours<br>OR<br>48-hour mortality                                                                                               | SWIFT<br>65 (61-70)<br>SOFA<br>65 (60-69)<br>TISS-28<br>67 (63-72) | SWIFT $\geq$ 7<br>88 (NR)<br>SOFA $\geq$ 1<br>62 (NR)<br>TISS-28 $\geq$ 10<br>82 (NR) | SWIFT $\geq$ 7<br>22 (NR)<br>SOFA $\geq$ 1<br>57 (NR)<br>TISS-28 $\geq$ 10<br>38 (NR) | Static  |
| Barbieri 2020 [30]<br>RNN               | Single Center<br>Retrospective<br>General ICU                    | 45,298 ICU admissions<br>(5,495 [12%]) | ICU readmission within 30<br>days                                                                                                                           | 74 (74-74)                                                         | 67 (66-69)                                                                            | 70 (69-71)                                                                            | Dynamic |
| Li 2019 [31]<br>Logistic Regression     | Single Center<br>Retrospective<br>Postoperative CICU             | 2,042 Patients<br>(80 [3%])            | CICU readmission during<br>index hospitalization                                                                                                            | 88 (NR)                                                            | NR                                                                                    | NR                                                                                    | Static  |
| Hammer 2020 [32]<br>Logistic Regression | Single Center<br>Retrospective<br>SICU                           | 7,126 Patients<br>(168 [2%])           | ICU readmission during<br>index hospitalization                                                                                                             | 78 (74-82)                                                         | 74 (NR)                                                                               | 72 (NR)                                                                               | Static  |
| Jo 2015 [33]<br>Logistic Regression     | Single Center<br>Retrospective<br>MICU                           | 343 Patients<br>(33 [10%])             | ICU readmission during<br>index hospitalization                                                                                                             | 76 (66-86)                                                         | NR                                                                                    | NR                                                                                    | Static  |
| Lee 2010 [34]<br>Logistic Regression    | Single Center<br>Retrospective<br>Non-postoperative<br>Neuro ICU | 753 Patients<br>(58 [8%])              | ICU readmission during<br>index hospitalization                                                                                                             | 75 (66-83)                                                         | 79 (NR)                                                                               | 59 (NR)                                                                               | Static  |
| Frost 2010 [35]<br>Logistic Regression  | Single Center<br>Retrospective<br>General ICU                    | 14,952 Patients<br>(896 [6%])          | ICU readmission during<br>index hospitalization                                                                                                             | 66 (NR)                                                            | NR                                                                                    | NR                                                                                    | Static  |
| Zhou 2016 [36]<br>Logistic Regression   | Single Center<br>Retrospective<br>Mixed SICU/MICU                | 1,653 Patients<br>(77 [5%])            | ICU readmission during<br>index hospitalization<br>OR<br>In-hospital mortality                                                                              | 61 (55-66)                                                         | 58 (47-69)                                                                            | 58 (56-61)                                                                            | Static  |

|                                                      |                                                      |                                       |                                                                                                                   |                                                                                                                                            |            |            |         |
|------------------------------------------------------|------------------------------------------------------|---------------------------------------|-------------------------------------------------------------------------------------------------------------------|--------------------------------------------------------------------------------------------------------------------------------------------|------------|------------|---------|
| Martin 2019 [37]<br>Logistic Regression              | Single Center<br>Retrospective<br>SICU               | 3,109 Patients<br>(141 [5%])          | ICU readmission within 72<br>hours                                                                                | 71 (NR)                                                                                                                                    | 49 (NR)    | 92 (NR)    | Static  |
| Thomson 2018 [38]<br>Logistic Regression             | Single Center<br>Retrospective<br>Postoperative CICU | 4,869 Patients<br>(156 [3%])          | ICU readmission during<br>index hospitalization                                                                   | NR                                                                                                                                         | NR         | NR         | Static  |
| Woldhek 2017 [39]<br>Logistic Regression             | Single Center<br>Retrospective<br>General ICU        | 19,750 ICU admissions<br>(1,378 [7%]) | ICU readmission within 24<br>hours, 48 hours, 72 hours,<br>or at any point during index<br>hospitalization        | ≤ 24 hours<br>68 (64-71)<br>≤ 48 hours<br>68 (65-70)<br>≤ 72 hours<br>68 (66-70)<br>Hospitalization<br>70 (69-72)                          | NR         | NR         | Static  |
| Yip 2013 [40]<br>Logistic Regression                 | Single Center<br>Retrospective<br>General ICU        | 1,446 Patients<br>(106 [7%])          | ICU readmission during<br>index hospitalization                                                                   | NR                                                                                                                                         | 18 (12-26) | 92 (90-93) | Static  |
| Loreto 2020 [41]<br>Multiple algorithms              | Single Center<br>Retrospective<br>General ICU        | 9,926 Patients<br>(658 [6.6%])        | ICU readmission                                                                                                   | 81 (NR)                                                                                                                                    | NR         | 91 (NR)    | Static  |
| Pakbin 2018 [43]<br>Logistic Regression<br>+ XGBoost | Single Center<br>Retrospective<br>General ICU        | 46,467 Patients<br>(9,872 [21%])      | ICU readmission within 24<br>hours, 72 hours, 7 days, 30<br>days, or at any point during<br>index hospitalization | ≤ 24 hours<br>71 (69-73)<br>≤ 72 hours<br>74 (73-75)<br>≤ 7 days<br>75 (74-76)<br>≤ 30 days<br>73 (72-74)<br>Hospitalization<br>81 (80-83) | NR         | NR         | Static  |
| Klepstad 2019 [44]<br>Linear Mixed Effect<br>Model   | Single Center<br>Retrospective<br>GI SICU            | 124 Patients<br>(20 [16%])            | ICU readmission<br>OR<br>Post-discharge mortality                                                                 | NR                                                                                                                                         | NR         | NR         | Dynamic |
| Taniguchi 2019 [45]<br>Linear Regression             | Single Center<br>Prospective<br>Mixed SICU/MICU      | 425 Patients<br>(43 [10.1%])          | ICU readmission<br>OR<br>Post-discharge mortality                                                                 | 71 (63-79)                                                                                                                                 | NR         | NR         | Static  |
| Haribhakti 2021<br>[46]<br>Logistic Regression       | Single Center<br>Retrospective<br>MICU               | 409 Patients<br>(36 [9%])             | ICU readmission                                                                                                   | 76 (68-84)                                                                                                                                 | NR         | NR         | Static  |

Overview of the intensive care unit readmission models development and performance. **CICU** cardiac intensive care unit; **ICU** intensive care unit; **MICU** medical intensive care unit; **SICU** surgical intensive care unit, **AUROC** area under the receiver operating characteristic curve; **NR** not reported; **CI** confidence interval; **SWIFT** Stability and Workload Index for Transfer; **SOFA** sequential organ failure assessment; **TISS-28** simplified Therapeutic Intervention Scoring System; **GBM** gradient boosting machine; **LSTM** long short-term memory; **RNN** recurrent neural network; **ANN** artificial neural network; **CRF** conditional random fields.



**Supplemental Table 2:** Summary of methodology, validation, and sensitivity analyses of studies reporting intensive care unit readmission prediction models.

| Author/<br>Model Type   | Data<br>source | Predictor<br>variables                                                                                                  | Predictor<br>selection<br>method    | Validation/ Imputation<br>method                                          | Calibration     | ICU<br>readmission<br>reasoning | ICU<br>readmission<br>timing                                   | Inclusion<br>criteria                                          | Exclusion<br>criteria                                                                                  |
|-------------------------|----------------|-------------------------------------------------------------------------------------------------------------------------|-------------------------------------|---------------------------------------------------------------------------|-----------------|---------------------------------|----------------------------------------------------------------|----------------------------------------------------------------|--------------------------------------------------------------------------------------------------------|
| Multiple Center Studies |                |                                                                                                                         |                                     |                                                                           |                 |                                 |                                                                |                                                                |                                                                                                        |
| Rojas 2018<br>[14]      | MIMIC          | Demographics, vital signs, lab values, medications, ICU interventions, diagnostic tests, ICD-9 codes, nursing documents | Clinical experience                 | Internal and external validation/NA                                       | Not reported    | Not collected.                  | Within 72 hours deemed early. Later than 72 hours deemed late. | Adult patients in ICU and transferred to medical-surgical ward | Facility transfer, death in ICU, withdrawn treatment, missing discharge disposition                    |
| Ouanes 2012 [15]        | NA             | Demographics, chronic disease severity, acute disease severity, nursing workload, discharge time                        | Clinical relevance and availability | Internal validation by bootstrap sampling/NA                              | Hosmer-Lemeshow | Not stated.                     | Within 7 days.                                                 | ICU patients discharged to a ward in the same hospital         | Facility transfer, ICU LOS < 24 h, death in ICU, withdrawn treatment                                   |
| VanDiepen 2014 [16]     | APPROACH       | Demographics, medical, angiographic, surgical, postoperative information                                                | NA                                  | Internal validation by bootstrapping/NA                                   | Hosmer-Lemeshow | Not stated.                     | No timing described                                            | CABG or valvular surgery and discharged alive                  | Noncardiovascular surgeries, cardiac or pulmonary transplant, isolated ventricular assist device, ECMO |
| Verma 2019 [17]         | NA             | Demographics, medical, angiographic, surgical,                                                                          | Model previously identified         | Previously internally validated. Article describes external validation/NA | Hosmer-Lemeshow | Not stated.                     | No timing described                                            | Cardiac surgery and discharged to cardiac                      | Noncardiovascular surgeries, cardiac or pulmonary transplant,                                          |

|                       |           |                                                                           |                                                                          |                                                                          |                 |             |                                |                                   |                                                                       |
|-----------------------|-----------|---------------------------------------------------------------------------|--------------------------------------------------------------------------|--------------------------------------------------------------------------|-----------------|-------------|--------------------------------|-----------------------------------|-----------------------------------------------------------------------|
|                       |           | postoperative information                                                 |                                                                          |                                                                          |                 |             |                                | surgical ward                     | isolated ventricular assist device, ECMO                              |
| Badawi 2012 [18]      | eICU      | Demographics, medical, angiographic, surgical, postoperative information  | Clinical experience, log-likelihood differences in readmissions or death | Internal validation/Multiple imputation                                  | Hosmer-Lemeshow | Not stated. | Within 48 h                    | ICU patients > 16                 | DNR or care withdrawal, facility transfer, death in ICU, ICU LOS <4 h |
| Fialho 2012 [19]      | MIMIC II  | Vital signs, lab values                                                   | Routine collection, independence, quantity                               | Ten-fold cross-validation/Last-observation-carried forward               | Hosmer-Lemeshow | Not stated  | 24 h - 72 h                    | ICU patients > 15                 | LOS > 24 h, missing data                                              |
| Chiu 2020 [29]        | NA        | Postoperative vital signs                                                 | Warning score previously identified                                      | Internal and external validation/Removed                                 | Hosmer-Lemeshow | Not stated. | Within 24 h                    | Adults with major cardiac surgery | Missing values, outliers, death in surgery or ICU                     |
| Katsrup 2013 [42]     | NA        | Vital signs, lab values, administrative data                              | Warning score previously identified                                      | Article describes external validation/Mean imputation or removed         | Hosmer-Lemeshow | Not stated  | Within 7 days                  | All ICU patients                  | Death in ICU, facility transfer                                       |
| Single Center Studies |           |                                                                           |                                                                          |                                                                          |                 |             |                                |                                   |                                                                       |
| Magruder 2015 [20]    | NA        | Demographics, administrative data, comorbidities, procedures              | NA                                                                       | No validation/NA                                                         | Not reported    | Collected.  | No timing described            | CABG or aortic valve replacement  | NR                                                                    |
| Caballero 2015 [21]   | MIMIC II  | Demographics, disease, symptoms, treatments, vital signs, chronic disease | Most discriminant variables by $\chi^2$ test                             | Internal five-fold cross-validation/Regularized expectation maximization | Not reported    | Not stated. | Within 30 days and at any time | >18 in ICU                        | Death in ICU                                                          |
| Lin 2019 [22]         | MIMIC III | Lab values, chronic diseases, demographics                                | NA                                                                       | 3x3 nested cross-validation/Last-observation-carried-forward             | Not reported    | Not stated. | Within 30 days                 | > 18 in ICU                       | NR                                                                    |

|                       |           |                                                                          |                      |                                                                                           |                 |             |                                                                |                                                       |                                                                                                                 |
|-----------------------|-----------|--------------------------------------------------------------------------|----------------------|-------------------------------------------------------------------------------------------|-----------------|-------------|----------------------------------------------------------------|-------------------------------------------------------|-----------------------------------------------------------------------------------------------------------------|
| Venugopalan 2017 [23] | MIMIC II  | Vital signs, lab values, administrative data, ICD-9 codes, comorbidities | Clinical experience  | Internal five-fold cross-validation/Cluster expectation maximization, copula function fit | Not reported    | Not stated. | Within 30 days                                                 | ICU patients readmitted after discharge               | < 12 hours of data                                                                                              |
| Xue 2019 [24]         | MIMIC II  | Demographics, vital signs, lab values, medications, comorbidities        | NA                   | Internal ten-fold cross-validation/Imputation method as independent variable              | Not reported    | Not stated. | Within 48 h                                                    | ICU patients > 16                                     | ICU visits other than general and neurosciences ICU, missing critical data, indeterminate discharge time        |
| Desautels 2017[25]    | MIMIC III | Demographics, vital signs, lab values, GCS                               | NA                   | No validation/Last-Observation-Carried-Forward                                            | Not reported    | Not stated. | Within 48 hours deemed early. Later than 48 hours deemed late. | Adult SICU patients                                   | Cardiac, LOS < 48 h or > 30 d, death in ICU, discharge for palliative care, facility transfer, cadaveric donors |
| Lee 2015 [26]         | NA        | Demographics, lab values, medications, administrative data               | APACHE II            | Internal validation by bootstrapping/NA                                                   | H-statistic     | Not stated. | No timing described                                            | ICU patients discharged to wards in the same hospital | Death in ICU, facility transfer                                                                                 |
| Ng 2018 [27]          | NA        | Demographics, vital signs, lab values, administrative data, procedures   | NA                   | No validation/Missing data separately categorized                                         | Hosmer-Lemeshow | Not stated. | Within 48 hours of discharge                                   | ICU patients > 18                                     | ICU LOS < 24 h                                                                                                  |
| Rosa 2015 [28]        | NA        | Administrative data, lab values, vital signs, interventions              | SWIFT, SOFA, TISS-28 | Internal validation/NA                                                                    | Hosmer-Lemeshow | Not stated. | Within 30 days of discharge                                    | ICU admission                                         | Death in ICU, death within 30 days of discharge                                                                 |
| Barbieri 2020 [30]    | MIMIC III | Demographics, administrative data, ICD-9, procedures,                    | NA                   | Internal validation/NA                                                                    | Not reported    | Collected.  | No timing described                                            | Adults who underwent cardiac valvular replacement     | Congenital valvular disease, death in surgery or ICU, missing data                                              |

|                  |    |                                                                                                                 |                                                |                                                                                 |                     |                                                                      |                                                               |                                               |                                                                                                                          |
|------------------|----|-----------------------------------------------------------------------------------------------------------------|------------------------------------------------|---------------------------------------------------------------------------------|---------------------|----------------------------------------------------------------------|---------------------------------------------------------------|-----------------------------------------------|--------------------------------------------------------------------------------------------------------------------------|
|                  |    | medications, vital signs                                                                                        |                                                |                                                                                 |                     |                                                                      |                                                               |                                               |                                                                                                                          |
| Li 2019 [31]     | NA | Demographic variables, medical history, hemodynamic parameters, surgical variables, postoperative complications | NA                                             | Internal validation by leave-one-out cross-validation/Removed                   | Hosmer-Lemeshow     | Collected.                                                           | Within 10 days                                                | SICU admission                                | Death in ICU, care withdrawal, American Society of Anesthesiologists physical status classification VI                   |
| Hammer 2020 [32] | NA | Demographics, vital signs, medications, procedures, mobility, neurological values, lab values                   | Literature review                              | Internal validation by bootstrapping/Multiple imputation with chained equations | Brier Score         | Readmission directly related to initial admission                    | No timing described                                           | ICU patients > 18                             | Death in ICU, facility transfer, ICU elective admission, DNR, declaration, deaths in ward, lack of intubation for > 48 h |
| Jo 2015 [33]     | NA | Demographics, vital signs, lab values, procedures, administrative data                                          | NA                                             | No validation/NA                                                                | Reliability Diagram | Not stated.                                                          | No timing described                                           | Neurological ICU patients                     | Unrelated to surgical procedures, brain tumor, spinal disease                                                            |
| Lee 2010 [34]    | NA | Demographics, vital signs, APACHE score                                                                         | APACHE II                                      | Internal validation by bootstrapping/NA                                         | Not reported        | Not stated.                                                          | Within 72 hours deemed early. Later than 72 hours deemed late | ICU patients > 15 transferred to general ward | Withdrawn care, facility transfer, death in ICU                                                                          |
| Frost 2010 [35]  | NA | Demographics, administrative data, comorbidities                                                                | Restricted to previously identified predictors | No validation/NA                                                                | Reliability Diagram | Readmission related to infection accounted for 9% of all readmission | Within the same hospitalization                               | ICU patients                                  | Death in ICU, care withdrawal                                                                                            |
| Zhou 2016 [36]   | NA | Lab values                                                                                                      | Hypothesis testing:                            | Internal validation/NA                                                          | Not reported        | Collected.                                                           | Within 72 h                                                   | SICU patients                                 | Planned readmission,                                                                                                     |

|                   |           |                                                                                |                                                |                                                                                                               |                 |                             |                                                                  |                                                                |                                                                                         |
|-------------------|-----------|--------------------------------------------------------------------------------|------------------------------------------------|---------------------------------------------------------------------------------------------------------------|-----------------|-----------------------------|------------------------------------------------------------------|----------------------------------------------------------------|-----------------------------------------------------------------------------------------|
|                   |           |                                                                                | recurrent infection markers                    |                                                                                                               |                 |                             |                                                                  |                                                                | death, hospital discharge within 72 h                                                   |
| Martin 2019 [37]  | NA        | Demographic, lab values, vital signs, medications                              | Routine collection                             | Internal validation by bootstrapping/Removed                                                                  | Not reported    | Not stated.                 | Majority within 2 weeks                                          | ICU patients > 18 undergoing cardiac surgery                   | Discharge home                                                                          |
| Thomson 2018 [38] | NA        | Administrative data, comorbidities                                             | Routine collection                             | No validation/Multiple imputation                                                                             | Hosmer-Lemeshow | Not stated.                 | Within 24, 48, 72 h                                              | ICU patients > 18                                              | ICU LOS < 4 h. Death in ICU. Death after discharge. Care withdrawal. Facility transfer. |
| Woldhek 2017 [39] | NA        | Demographics, administrative data, comorbidities, lab values, vital signs      | Restricted to previously identified predictors | No validation/No missing variables                                                                            | Hosmer-Lemeshow | Not stated.                 | No timing described                                              | ICU patients                                                   | Death in ICU                                                                            |
| Yip 2013 [40]     | NA        | Demographics, lab values, comorbidities, vital signs                           | Hypothesis testing: eosinophilia               | Internal and external validation/NA                                                                           | Not reported    | Not collected.              | Within 72 hours deemed early. Later than 72 hours deemed late.   | Adult patients in ICU and transferred to medical-surgical ward | Facility transfer, death in ICU, withdrawn treatment, missing discharge disposition     |
| Loreto 2020 [41]  | NA        | Demographics, administrative data, comorbidities, intervention, lab values     | Characteristics available at admission         | Ten-fold cross-validation/Varies based on algorithm                                                           | NA              | Collected but not reported. | No timing described                                              | Adult patients in ICU                                          | Death in ICU                                                                            |
| Pakbin 2018 [43]  | MIMIC III | Demographics, administrative data, ICD-9, procedures, medications, vital signs | NA                                             | Five-fold cross-validation/Mean imputation for continuous variables and Zero imputation for Boolean variables | Not reported    | Not stated.                 | Within 24 hours, 72 hours, 7 days, 30 days, same hospitalization | Adult patients in ICU                                          | NA                                                                                      |

|                         |    |                                                                                            |                                           |                                             |                     |                   |                        |                             |                                                                                                |
|-------------------------|----|--------------------------------------------------------------------------------------------|-------------------------------------------|---------------------------------------------|---------------------|-------------------|------------------------|-----------------------------|------------------------------------------------------------------------------------------------|
| Klepstad<br>2019 [44]   | NA | Demographics,<br>vital signs,<br>comorbidities                                             | Warning score<br>previously<br>identified | NA/Removed                                  | Not reported        | Not stated.       | No timing<br>described | ICU patients                | Death in ICU,<br>withdrawn<br>treatment, facility<br>transfer, missing<br>data                 |
| Taniguchi<br>2019 [45]  | NA | Demographics,<br>comorbidities,<br>administrative<br>data, lab<br>values,<br>interventions | Warning score<br>previously<br>identified | Article describes<br>external validation/NA | Hosmer-<br>Lemeshow | Not stated.       | No timing<br>described | Adult<br>patients in<br>ICU | ICU LOS < 12 h,<br>pregnancy, death<br>in ICU, facility<br>transfer,<br>withdrawn<br>treatment |
| Haribhakti<br>2021 [46] | NA | Demographics,<br>comorbidities,<br>administrative<br>data, lab<br>values,<br>interventions | Clinical<br>experience                    | Internal<br>validation/Removed              | Not reported        | Not<br>collected. | No timing<br>described | Adult<br>patients in<br>ICU | Pregnancy,<br>withdrawn<br>treatment, death<br>in ICU                                          |

Overview of the intensive care unit readmission models methodology, validation, and sensitivity analyses. **ICU** intensive care unit; **NA** not available; **NR** not reported; **SWIFT** Stability and Workload Index for Transfer; **SOFA** sequential organ failure assessment; **TISS-28** simplified Therapeutic Intervention Scoring System; **CABG** coronary artery bypass graft; **GBM** gradient boosting machine; **LSTM** long short-term memory; **RNN** recurrent neural network; **ANN** artificial neural network; **CRF** conditional random fields.

**Supplemental Table 3:** Intensive care unit readmission prediction model risk of bias.

| Author                | Risk of bias introduced by selection of participants | Concern that the included participants and setting do not match the review question | Risk of bias introduced by predictors or their assessment | Concern that the definition, assessment or timing of predictors in the model do not match the review question | Risk of bias introduced by the outcome or its determination | Concern that the outcome, its definition, timing or determination do not match the review question | Risk of bias introduced by the analysis | Overall judgement of risk of bias | TRIPOD Affidavit |
|-----------------------|------------------------------------------------------|-------------------------------------------------------------------------------------|-----------------------------------------------------------|---------------------------------------------------------------------------------------------------------------|-------------------------------------------------------------|----------------------------------------------------------------------------------------------------|-----------------------------------------|-----------------------------------|------------------|
| Rojas 2018 [14]       | Low                                                  | Low                                                                                 | Low                                                       | Low                                                                                                           | Low                                                         | Low                                                                                                | Low                                     | Low                               | No               |
| Ouanes 2012 [15]      | Low                                                  | Low                                                                                 | Low                                                       | Low                                                                                                           | Low                                                         | Low                                                                                                | Low                                     | Low                               | No               |
| Van Diepen 2014 [16]  | Low                                                  | Low                                                                                 | Low                                                       | Low                                                                                                           | Low                                                         | Low                                                                                                | Low                                     | Low                               | No               |
| Verma 2019 [17]       | Low                                                  | Low                                                                                 | Low                                                       | Low                                                                                                           | Low                                                         | Low                                                                                                | Low                                     | Low                               | No               |
| Badawi 2012 [18]      | Low                                                  | Low                                                                                 | Low                                                       | Low                                                                                                           | Low                                                         | Low                                                                                                | Low                                     | Low                               | No               |
| Fialho 2012 [19]      | Low                                                  | Low                                                                                 | Low                                                       | Low                                                                                                           | Low                                                         | Low                                                                                                | Low                                     | Low                               | No               |
| Magruder 2015 [20]    | Low                                                  | Low                                                                                 | Low                                                       | Low                                                                                                           | Low                                                         | Low                                                                                                | Low                                     | Low                               | No               |
| Caballero 2015 [21]   | Low                                                  | Low                                                                                 | Low                                                       | Low                                                                                                           | Low                                                         | Low                                                                                                | Low                                     | Low                               | No               |
| Lin 2019 [22]         | Low                                                  | Low                                                                                 | Low                                                       | Low                                                                                                           | Low                                                         | Low                                                                                                | Low                                     | Low                               | No               |
| Venugopalan 2017 [23] | Low                                                  | Low                                                                                 | Unclear                                                   | Low                                                                                                           | Low                                                         | Low                                                                                                | Low                                     | Low                               | No               |
| Xue 2019 [24]         | Low                                                  | Low                                                                                 | Low                                                       | Low                                                                                                           | Low                                                         | Low                                                                                                | Low                                     | Low                               | No               |
| Desautels 2017 [25]   | Low                                                  | Low                                                                                 | Low                                                       | Low                                                                                                           | Low                                                         | Low                                                                                                | Low                                     | Low                               | No               |
| Lee 2015 [26]         | Low                                                  | Low                                                                                 | Low                                                       | Unclear                                                                                                       | Unclear                                                     | Unclear                                                                                            | High                                    | High                              | No               |
| Ng 2018 [27]          | Low                                                  | Low                                                                                 | Low                                                       | Unclear                                                                                                       | Low                                                         | Low                                                                                                | Unclear                                 | Low                               | No               |
| Rosa 2015 [28]        | Low                                                  | Low                                                                                 | Low                                                       | Low                                                                                                           | Low                                                         | Low                                                                                                | Low                                     | Low                               | No               |
| Chiu 2020 [29]        | Low                                                  | Unclear                                                                             | Low                                                       | Low                                                                                                           | Low                                                         | Low                                                                                                | Low                                     | Low                               | No               |
| Barbieri 2020 [30]    | Low                                                  | Low                                                                                 | Unclear                                                   | Unclear                                                                                                       | Low                                                         | Low                                                                                                | Low                                     | Low                               | No               |
| Li 2019 [31]          | Low                                                  | Low                                                                                 | Low                                                       | Low                                                                                                           | Low                                                         | Low                                                                                                | Unclear                                 | Unclear                           | No               |
| Hammer 2020 [32]      | Low                                                  | Low                                                                                 | Unclear                                                   | Unclear                                                                                                       | Low                                                         | Low                                                                                                | Low                                     | Low                               | No               |
| Jo 2015 [33]          | High                                                 | High                                                                                | Unclear                                                   | Unclear                                                                                                       | Low                                                         | Unclear                                                                                            | Unclear                                 | High                              | No               |
| Lee 2010 [34]         | Unclear                                              | Unclear                                                                             | Low                                                       | Low                                                                                                           | Low                                                         | Unclear                                                                                            | High                                    | High                              | No               |

|                      |      |     |     |     |     |         |         |         |    |
|----------------------|------|-----|-----|-----|-----|---------|---------|---------|----|
| Frost 2010 [35]      | Low  | Low | Low | Low | Low | Low     | Unclear | Unclear | No |
| Zhou 2016 [36]       | Low  | Low | Low | Low | Low | Low     | Unclear | Unclear | No |
| Martin 2019 [37]     | Low  | Low | Low | Low | Low | Low     | Low     | Low     | No |
| Thomson 2018 [38]    | Low  | Low | Low | Low | Low | Low     | Low     | Low     | No |
| Woldhek 2017 [39]    | Low  | Low | Low | Low | Low | Low     | Low     | Low     | No |
| Yip 2013 [40]        | Low  | Low | Low | Low | Low | Low     | Low     | Low     | No |
| Loreto 2020 [41]     | Low  | Low | Low | Low | Low | Unclear | Low     | Unclear | No |
| Kastrup 2013 [42]    | High | Low | Low | Low | Low | Low     | Low     | High    | No |
| Pakbin 2018 [43]     | High | Low | Low | Low | Low | Low     | Low     | High    | No |
| Klepstad 2019 [44]   | Low  | Low | Low | Low | Low | Low     | High    | High    | No |
| Taniguchi 2019 [45]  | Low  | Low | Low | Low | Low | Low     | Low     | Low     | No |
| Haribhakti 2021 [46] | Low  | Low | Low | Low | Low | Low     | Low     | Low     | No |

Articles were adjudicated according to PROBAST (Prediction model Risk Of Bias ASsessment Tool) criteria.
